# Supplementary material
Source: PubMed Central journal article supplement (PMC6839698)
Supplement: NIHMS1528625-supplement-Supplemental_Table_2.pdf [file NIHMS1528625-supplement-Supplemental_Table_2.pdf]

**Supplemental Table II.** Baseline characteristics and number of incident coronary heart disease events by levels of metabolite risk score (deciles).

|                                         | Decile:<br>10th | Decile:<br>20th | Decile:<br>30th | Decile:<br>40th | Decile:<br>50th | Decile:<br>60th | Decile:<br>70th | Decile:<br>80th | Decile:<br>90th | Decile:<br>100th |
|-----------------------------------------|-----------------|-----------------|-----------------|-----------------|-----------------|-----------------|-----------------|-----------------|-----------------|------------------|
| Participants, n                         | 360             | 360             | 360             | 359             | 360             | 360             | 359             | 360             | 360             | 360              |
| Age (years)                             | 51.2 (5.2)      | 52.7 (5.5)      | 52.3 (5.4)      | 53.0 (5.6)      | 53.3 (5.6)      | 53.2 (5.7)      | 53.8 (5.9)      | 54.0 (5.9)      | 54.3 (5.6)      | 55.6 (5.7)       |
| Male, n (%)                             | 39<br>(10.8%)   | 87<br>(24.2%)   | 109<br>(30.3%)  | 137<br>(38.2%)  | 135<br>(37.5%)  | 157<br>(43.6%)  | 154<br>(42.9%)  | 186<br>(51.7%)  | 183<br>(50.8%)  | 216<br>(60.0%)   |
| SBP (mm Hg)                             | 121.3<br>(19.6) | 123.2<br>(19.1) | 124.1<br>(18.3) | 123.1<br>(21.0) | 124.3<br>(19.8) | 122.2<br>(21.1) | 124.4<br>(20.0) | 124.9<br>(19.5) | 127.1<br>(21.3) | 130.8<br>(22.7)  |
| Anti-hypertensive medication use, n (%) | 88<br>(24.4%)   | 94<br>(26.1%)   | 100<br>(27.8%)  | 112<br>(31.2%)  | 90<br>(25.0%)   | 95<br>(26.4%)   | 97<br>(27.0%)   | 121<br>(33.6%)  | 124<br>(34.4%)  | 183<br>(50.8%)   |
| HDL-c (mmol/L)                          | 1.6 (0.5)       | 1.5 (0.5)       | 1.5 (0.4)       | 1.4 (0.4)       | 1.4 (0.4)       | 1.4 (0.4)       | 1.3 (0.4)       | 1.3 (0.4)       | 1.3 (0.4)       | 1.2 (0.4)        |
| TC (mmol/L)                             | 5.5 (1.2)       | 5.6 (1.0)       | 5.4 (1.1)       | 5.5 (1.0)       | 5.5 (1.0)       | 5.5 (1.1)       | 5.5 (1.1)       | 5.5 (1.0)       | 5.7 (1.2)       | 5.6 (1.2)        |
| Prevalent Diabetes, n (%)               | 30 (8.3%)       | 34 (9.4%)       | 31 (8.6%)       | 43 (12.0%)      | 38 (10.6%)      | 47 (13.1%)      | 53 (14.8%)      | 44 (12.2%)      | 55 (15.3%)      | 82 (22.8%)       |
| Smoking status                          |                 |                 |                 |                 |                 |                 |                 |                 |                 |                  |
| Current, n (%)                          | 75<br>(20.8%)   | 88<br>(24.4%)   | 82<br>(22.8%)   | 79<br>(22.0%)   | 104<br>(28.9%)  | 115<br>(31.9%)  | 115<br>(32.0%)  | 101<br>(28.1%)  | 108<br>(30.0%)  | 116<br>(32.2%)   |
| Former, n (%)                           | 107<br>(29.7%)  | 79<br>(21.9%)   | 88<br>(24.4%)   | 104<br>(29.0%)  | 92<br>(25.6%)   | 98<br>(27.2%)   | 106<br>(29.5%)  | 94<br>(26.1%)   | 109<br>(30.3%)  | 112<br>(31.1%)   |
| Never, n (%)                            | 178<br>(49.4%)  | 193<br>(53.6%)  | 190<br>(52.8%)  | 176<br>(49.0%)  | 164<br>(45.6%)  | 147<br>(40.8%)  | 138<br>(38.4%)  | 165<br>(45.8%)  | 143<br>(39.7%)  | 132<br>(36.7%)   |

Abbreviations: CHD, coronary heart disease; SBP, systolic blood pressure; HDL-c, high-density lipoprotein cholesterol, and TC, serum total cholesterol.

Data are expressed as mean ± standard errors for quantitative traits.
